# Supplementary material for: Reactive Chemical Vapor Deposition Method as New Approach for Obtaining Electroluminescent Thin Film Materials
Source: Hindawi journal article supplement (doi:10.1155/2012/809028), 2012-01-01
Supplement: f1 [file 809028.f1.doc]

**Supplementary Materials**

**Reactive chemical vapor deposition method as new approach for obtaining electroluminescent thin film materials**

Valentina V. Utochnikova1,3*, Oxana V. Kotova1,2, Andrey A. Vaschenko3, Leonid S. Lepnev3, Natalia P. Kuzmina1*

**The interaction of Tb(dpm)3 and H2tph in ethanol solution**

The powder of H2tph (3 mmol) was suspended in the ethanol solution of Tb(dpm)3 (2 mmol) and refluxed during 4 hours. Precipitate was filtered off, thoroughly washed with ethanol and dried in vacuum at 60 ºC. According to thermal and elemental analyses data it contained Tb2(tph)3, contaminated by a great excess of H2tph.

Tb2(tph)3(H2tph)n(H2O)7 Calcd. For n~40: %C 54.49, %H 3.46, found %C 54.58, %H 3.49

Thermal treatment of the precipitate in vacuum at 360 ºC during 1 hour led to Tb2(tph)3 formation in both cases according to thermal (Fig. S1) and elemental analyses.

Tb2(tph)3 Calcd. %C 35.56, %H 1.48, found %C 35.15, %H 1.28

Fig. S1 TG data of the ligand exchange reaction in ethanol (a) the product before and (d) after annealing in comparison with (b) H2tph and (c) II.

Fig. S2 Normalized PL spectrum of Gd2(nda)3(H2O)6 at room temperature and at 77K (λex=337 nm)

**Fig. S3 Normalized PL spectrum of H2tph at 77K (λex=337 nm) with and without time delay**
